# Supplementary material
Source: HighWire-hosted journal article supplement (https://bjo.bmj.com/content/102/7/996)
Supplement: inline-supplementary-material-1 [file inline-supplementary-material-1.pdf]

**Supplementary Table 1 Genotype and allele frequencies of rs7234029 in patients and controls stratified by gender**

| Gender | Genotype allele | BD   |       | Controls |       | P Value               | Pc Value              | OR    | 95%CI       |
|--------|-----------------|------|-------|----------|-------|-----------------------|-----------------------|-------|-------------|
|        |                 | N    | %     | N        | %     |                       |                       |       |             |
| Male   | A               | 1061 | 0.703 | 1718     | 0.703 | 0.984                 | NS                    | 0.999 | 0.868-1.149 |
|        | AA              | 335  | 0.444 | 605      | 0.495 | 0.026                 | NS                    | 0.813 | 0.678-0.976 |
|        | AG              | 391  | 0.518 | 508      | 0.416 | $9.32 \times 10^{-6}$ | $4.01 \times 10^{-4}$ | 1.51  | 1.258-1.812 |
|        | GG              | 29   | 0.038 | 109      | 0.089 | $1.66 \times 10^{-5}$ | $7.14 \times 10^{-4}$ | 0.408 | 0.268-0.621 |
| Female | A               | 207  | 0.685 | 1375     | 0.719 | 0.228                 | NS                    | 0.851 | 0.654-1.106 |
|        | AA              | 65   | 0.43  | 497      | 0.52  | 0.041                 | NS                    | 0.698 | 0.494-0.987 |
|        | AG              | 77   | 0.51  | 381      | 0.399 | 0.01                  | NS                    | 1.57  | 1.113-2.216 |
|        | GG              | 9    | 0.06  | 78       | 0.082 | 0.351                 | NS                    | 0.713 | 0.350-1.455 |

**Supplementary Table 2 Logistic Regression Analysis of the Risk of BD Patients with PTPN2/rs7234029 in Additive Codominant, Dominant, Allelic, and Recessive Models**

| Model         | Genotype | Control<br>( <i>N</i> =<br>2178) | Case<br>( <i>N</i> = 906) | Univariate logistic<br>regression |           |                       | Multivariate logistic<br>regression <sup>a</sup> |        |                       |                       |
|---------------|----------|----------------------------------|---------------------------|-----------------------------------|-----------|-----------------------|--------------------------------------------------|--------|-----------------------|-----------------------|
|               |          |                                  |                           | OR                                | 95% CI    | <i>P</i>              | OR                                               | 95% CI | <i>P</i> <sup>a</sup> |                       |
| Additive      |          | 217870.62                        | 90629.38                  | 1.050                             | 0.931.19  | 0.40                  | 1.01                                             | 0.88   | 1.15                  | 0.88                  |
| Co-dominant   | AA       | 110250.60                        | 40044.15                  |                                   |           |                       |                                                  |        |                       | 2.98×10 <sup>-4</sup> |
|               | AG       | 88940.82                         | 46851.66                  | 1.451                             | 1.241.705 | 3.0×10 <sup>-6</sup>  | 1.38                                             | 1.16   | 1.64                  | 2.41×10 <sup>-4</sup> |
|               | GG       | 187                              | 8.59                      | 38                                | 4.190     | 0.560.390             | 8.11.95×10 <sup>-3</sup>                         | 0.52   | 0.35                  | 0.76                  |
| Dominant      | AA       | 110250.60                        | 40044.15                  |                                   |           |                       |                                                  |        |                       |                       |
|               | AG+GG    | 107649.40                        | 50655.85                  | 1.301                             | 1.111.511 | 1.12×10 <sup>-3</sup> | 1.23                                             | 1.04   | 1.45                  | 1.58×10 <sup>-2</sup> |
| Recessive     | AA+AG    | 199191.41                        | 86895.81                  |                                   |           |                       |                                                  |        |                       |                       |
|               | GG       | 187                              | 8.59                      | 38                                | 4.190     | 0.470.330             | 0.672.89×10 <sup>-5</sup>                        | 0.44   | 0.30                  | 0.65                  |
| Over-dominant | AA+GG    | 128959.18                        | 43848.34                  |                                   |           |                       |                                                  |        |                       |                       |
|               | AG       | 88940.82                         | 46851.66                  | 1.551                             | 1.331.813 | 6.6×10 <sup>-8</sup>  | 1.49                                             | 1.26   | 1.76                  | 3.18×10 <sup>-6</sup> |
| Allelic       | A        | 309371.01                        | 126869.98                 |                                   |           |                       |                                                  |        |                       |                       |
|               | G        | 126328.99                        | 54430.02                  | 1.050                             | 0.931.18  |                       | 0.42                                             | 1.01   | 0.89                  | 1.15                  |

<sup>a</sup>Adjusted for age and gender in the logistic regression model.
